# Supplementary material for: Allele specific DNAzyme assembly for fast and convenient SNP colorimetric genotyping directly from noninvasive crude samples
Source: Royal Society of Chemistry journal article supplement (doi:10.1039/c8ay02668h), 2018-12-28
Supplement: c8ay02668h1.pdf [file c8ay02668h1.pdf]

## Supporting information

### **Allele specific DNzyme assembly for fast and convenient SNP colorimetric genotyping directly from noninvasive crude sample**

Lizhen Huang<sup>1,3,a</sup>, Qianfeng Xia<sup>2,a</sup>, Yuhong Zhang<sup>1</sup>, Huili Bai<sup>1</sup>, Nini Luo<sup>1</sup>, Linguo Xiang<sup>1</sup>, Shijia Ding<sup>3</sup>, Wei Cheng<sup>1,\*</sup>

<sup>1</sup>*The Center for Clinical Molecular Medical detection, The First Affiliated Hospital of Chongqing Medical University, Chongqing 400016, P.R. China*

<sup>2</sup>*Laboratory of Tropical Biomedicine Technology, School of Tropical Medicine and Laboratory Medicine, Hainan Medical University, Haikou, 571199, China*

<sup>3</sup>*Key Laboratory of Clinical Laboratory Diagnostics (Ministry of Education), College of Laboratory Medicine, Chongqing Medical University, Chongqing 400016, P.R. China*

\* *Corresponding author: Tel: +86-23-89011816. Fax: +86-23-68811487*

*Email: chengwei@hospital.cqmu.edu.cn;*

*ORCID: 0000-0002-1921-9761*

*<sup>a</sup> These authors contributed equally to this work.*

#### **Contents:**

**Section 1. Experimental section**

**Section 2. Figures and tables**

## Supplement of Experimental section

**DNA purification.** Total genomic DNA was extracted from 200  $\mu$ L of blood samples using a TIANamp genomic DNA kit from TianGen Biotech Co., Ltd (Beijing, China) according to the manufacturer's instructions. The quantity of DNA was measured by a NanoDrop 1000 ultraviolet spectrophotometer (Thermo Scientific, Wilmington, DE, USA). The DNA yield per buccal swab was calculated by multiplying the DNA concentration by the final volume of DNA extract and the epithelial cell amount was calculated by the DNA yield divided by the amount of DNA per cell ( $\sim 6$ pg).<sup>1</sup>

## Supplement of Figures and Tables

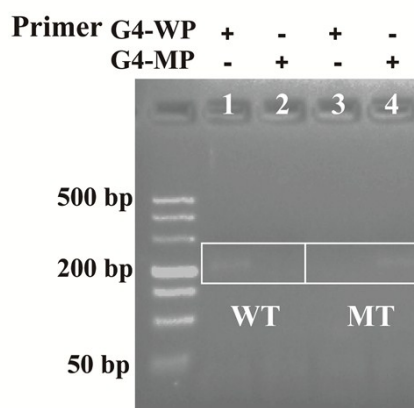

**Fig. S1.** The gel electrophoresis analysis of the amplification products of G4-AS primers with 68 °C annealing temperature.

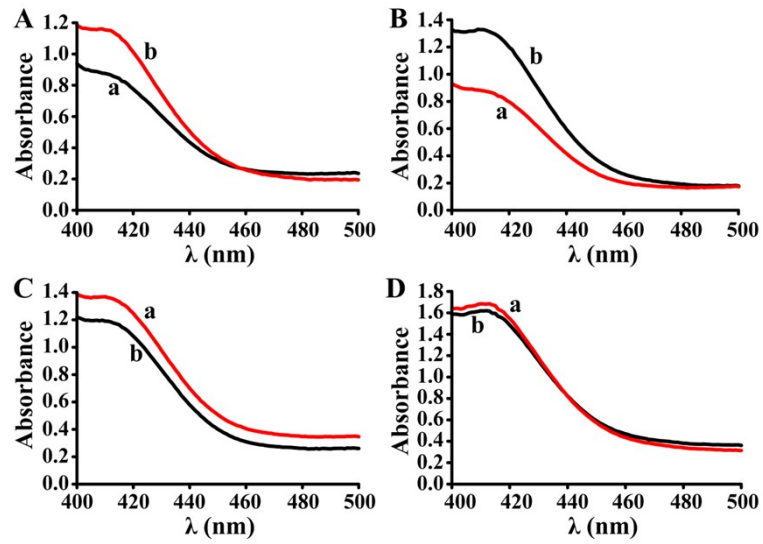

**Fig. S2.** The UV-vis absorbance spectra of the ASDA-based colorimetric assay for (A) negative control (without DNA polymerase ), (B) wild, (C) heterozygous, (D) mutation whole blood sample. (a) WP tube, (b) MP tube.

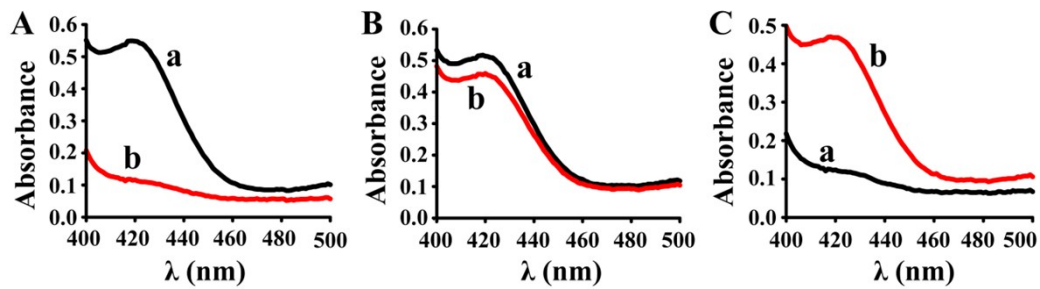

**Fig. S3.** The UV-vis absorbance spectra of the ASDA-based colorimetric assay of (A) wild, (B) heterozygous, (C) mutation leukocyte sample. (a) WP tube, (b) MP tube.

**Table S1.** Primer sequences used in this study (WP, wild specific primer, MP, mutation specific primer, The red and italics letters stand for an additional mismatch at the third base of the 3' terminus of forward primers. The stem regions of G4-containing hairpin are underlined).

| Application    | Primer           | Sequence ( from 5' to 3')                                                                                         |
|----------------|------------------|-------------------------------------------------------------------------------------------------------------------|
| AS PCR         | WP (Match)       | AGG AGA AGG TGT CTG CGG GAG C                                                                                     |
|                | MP (Match)       | AGG AGA AGG TGT CTG CGG GAG T                                                                                     |
|                | WP (TT mismatch) | AGG AGA AGG TGT CTG CGG <i>G</i> TG C                                                                             |
|                | MP (TT mismatch) | AGG AGA AGG TGT CTG CGG <i>G</i> TG T                                                                             |
|                | WP (TC mismatch) | AGG AGA AGG TGT CTG CGG GCG C                                                                                     |
|                | MP (TC mismatch) | AGG AGA AGG TGT CTG CGG GCG T                                                                                     |
|                | WP (TG mismatch) | AGG AGA AGG TGT CTG CGG GGG C                                                                                     |
|                | MP (TG mismatch) | AGG AGA AGG TGT CTG CGG GGG T                                                                                     |
|                | Reverse primer   | GCC CCT CAC CTG GAT GGG AAA G                                                                                     |
|                | G4 -WP           | <u>GGG TAG GGC GGG TTG GGT T spacer18 AAC</u><br><u>CCG CCC TAC CCA AAA GGA GAA GGT GTC</u><br>TGC GGG <i>TGC</i> |
|                | G4-MP            | <u>GGG TAG GGC GGG TTG GGT T spacer18 AAC</u><br><u>CCG CCC TAC CCA AAA GGA GAA GGT GTC</u><br>TGC GGG <i>TGT</i> |
|                | G4-RP            | <u>GGG TAG GGC GGG TTG GGT T spacer18 AAC</u><br><u>CCG CCC TAC CCA AAG CCC CTC ACC TGG</u><br>ATG GGA AAG        |
|                | PCR-RFLP         | Forward primer                                                                                                    |
| Reverse primer |                  | GAC GGT GCG GTG AGA GTG                                                                                           |

**Table S2.** Concentration and yield of DNA extracted from buccal swab samples

| Sample                                                     | 1   | 2    | 3   | 4   | 5   |
|------------------------------------------------------------|-----|------|-----|-----|-----|
| DNA concentration<br>(ng/ $\mu$ L)                         | 4.0 | 18.1 | 7.5 | 6.0 | 9.2 |
| Total DNA yield<br>(ng)                                    | 200 | 543  | 216 | 180 | 276 |
| The calculated epithelial<br>cell amount ( $\times 10^4$ ) | 3.3 | 9.1  | 3.6 | 3.0 | 4.6 |

**Table S3.** Genotyping results of MTHFR C667T polymorphism of 30 buccal swab samples and their frequencies.

|                      |       | ASDA (n = 30) |    |    | Discrepant | Total | Agreement | Frequency |
|----------------------|-------|---------------|----|----|------------|-------|-----------|-----------|
|                      |       | CC            | CT | TT |            |       |           |           |
| PCR-RFLP<br>(n = 30) | CC    | 8             | 0  | 0  | 0          | 8     | 100%      | 27%       |
|                      | CT    | 0             | 18 | 0  | 0          | 18    | 100%      | 60%       |
|                      | TT    | 0             | 0  | 4  | 0          | 4     | 100%      | 13%       |
|                      | Total | 8             | 18 | 4  | 0          | 30    | 100%      | 100%      |

## Reference

1. V. J. Bailey, H. Easwaran, Y. Zhang, E Griffiths, S. A. Belinsky, J. G Herman, S. B. Baylin, H. E. Carraway and T. H. Wang, *Genome Res*, 2009, **19**, 1455-1461.
